# Supplementary material
Source: ML conference proceedings conference paper supplement (https://openreview.net/forum?id=uNmKBZrRZC)

# Distribution of errors in $\varepsilon$ -greedy

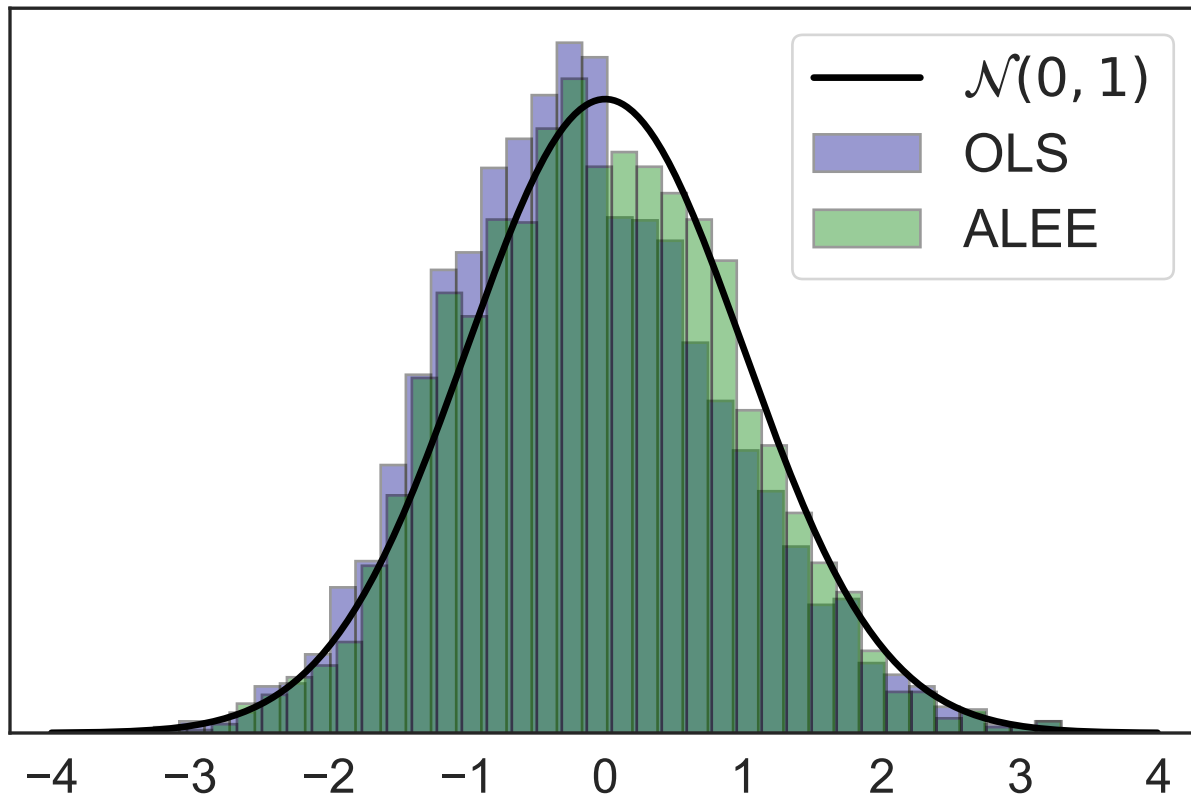

Supplement: supplementary_material [file attachment]

# AR: upper tail coverage for $\theta^*$

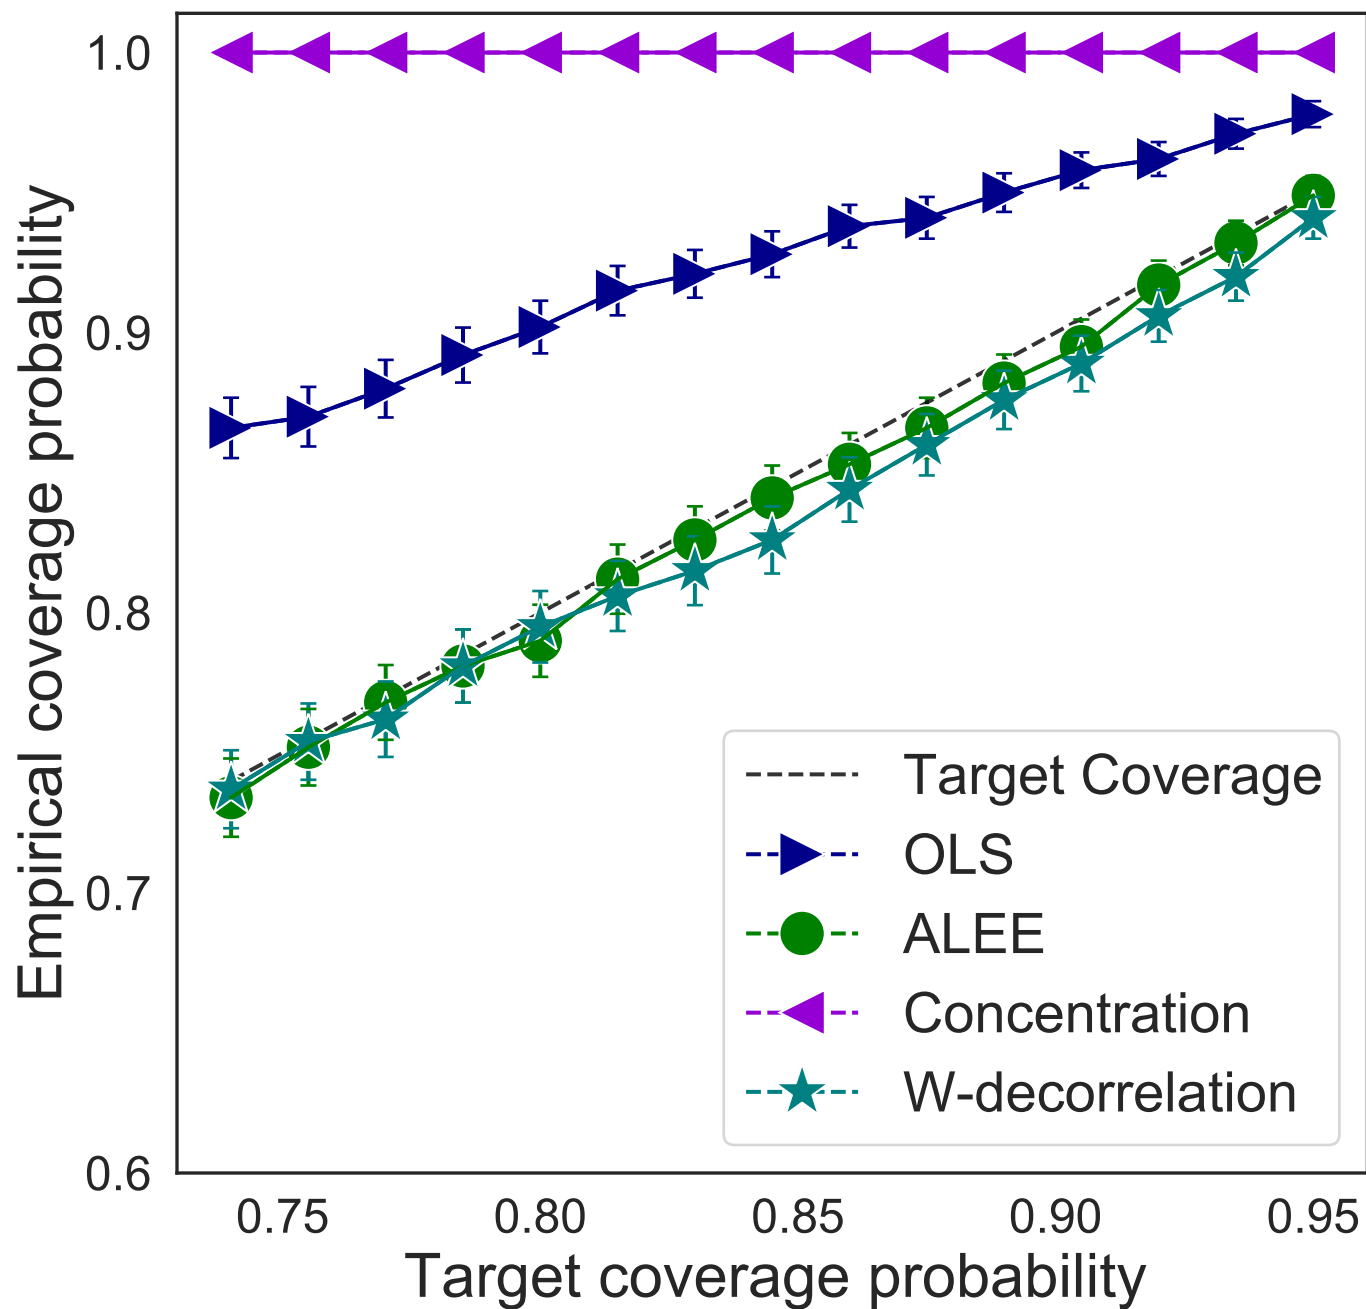

Supplement: supplementary_material [file attachment]

# Distribution of errors in AR(1)

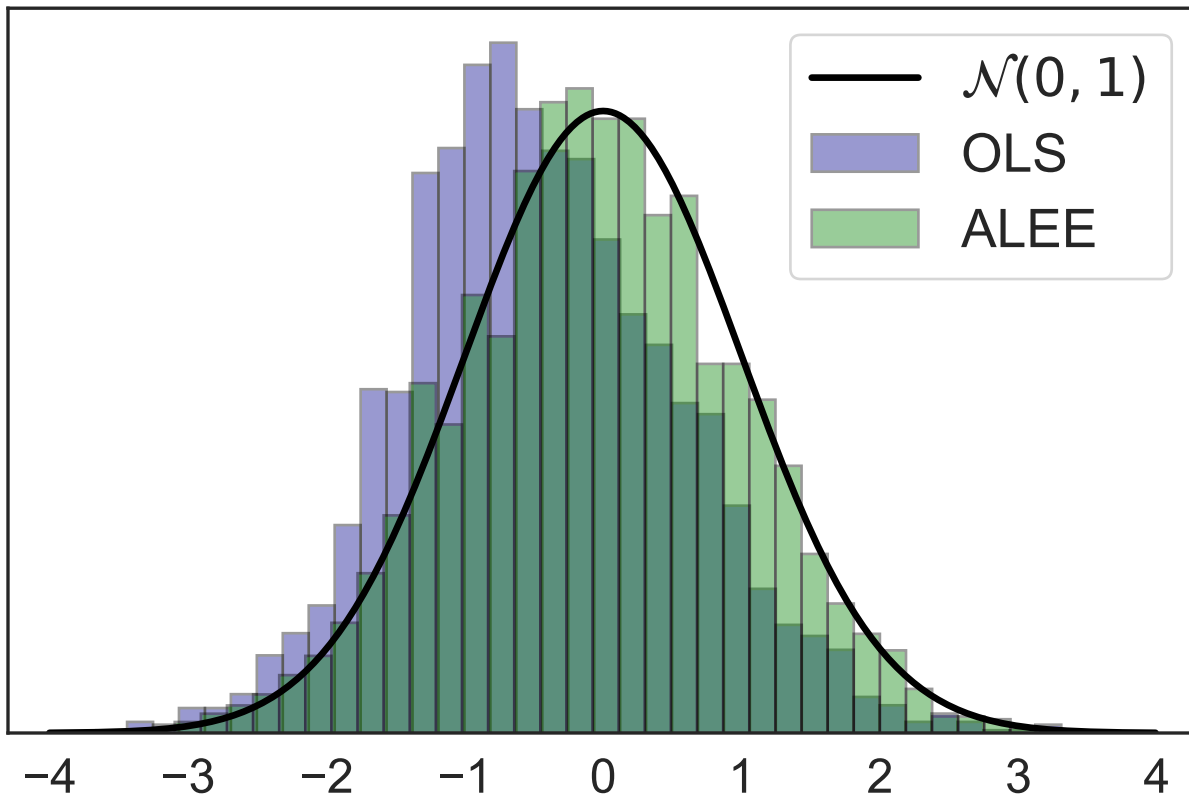

Supplement: supplementary_material [file attachment]

# AR: upper tail coverage for $\theta^*$

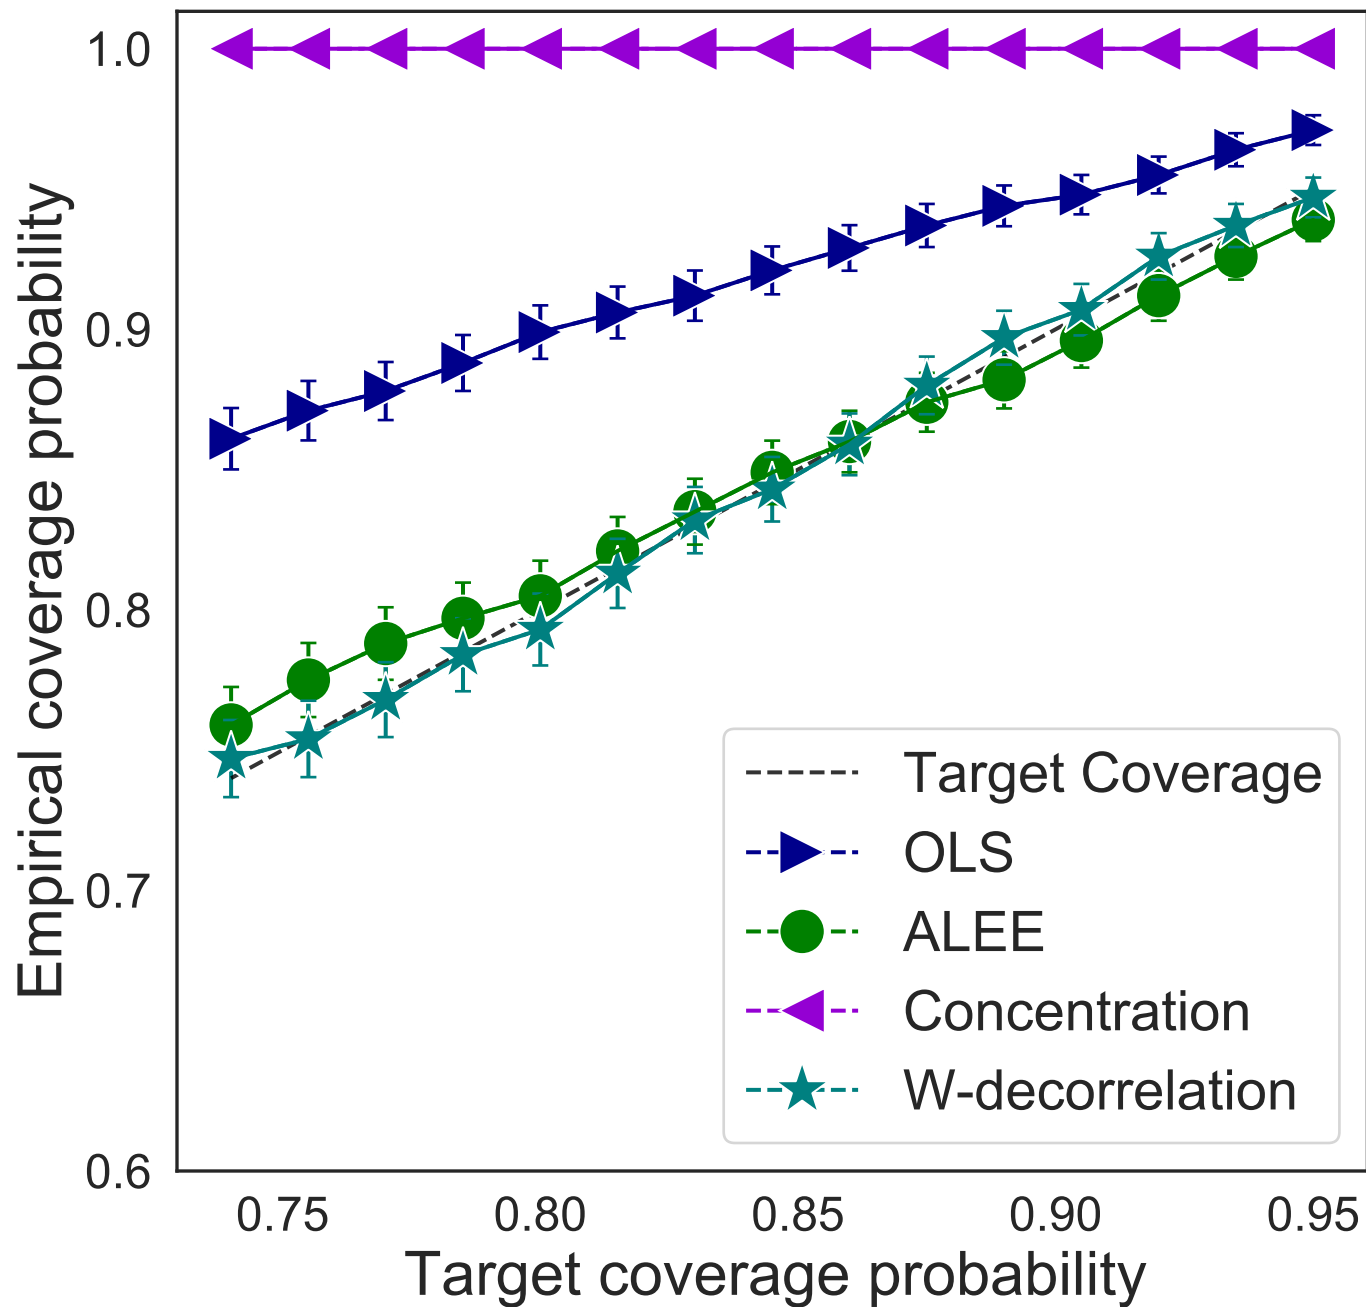

Supplement: supplementary_material [file attachment]

# Distribution of errors in $\varepsilon$ -greedy

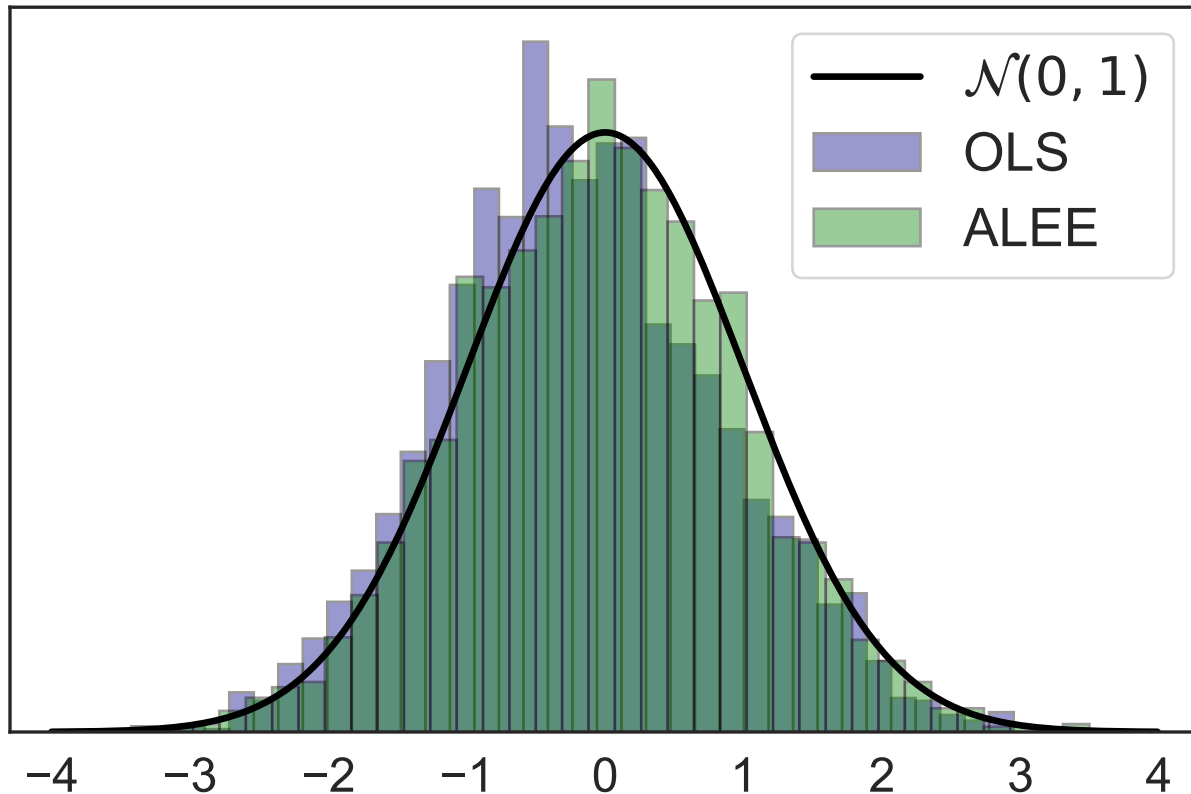

Supplement: supplementary_material [file attachment]

# Average two-sided CI width for $\theta_1^*$

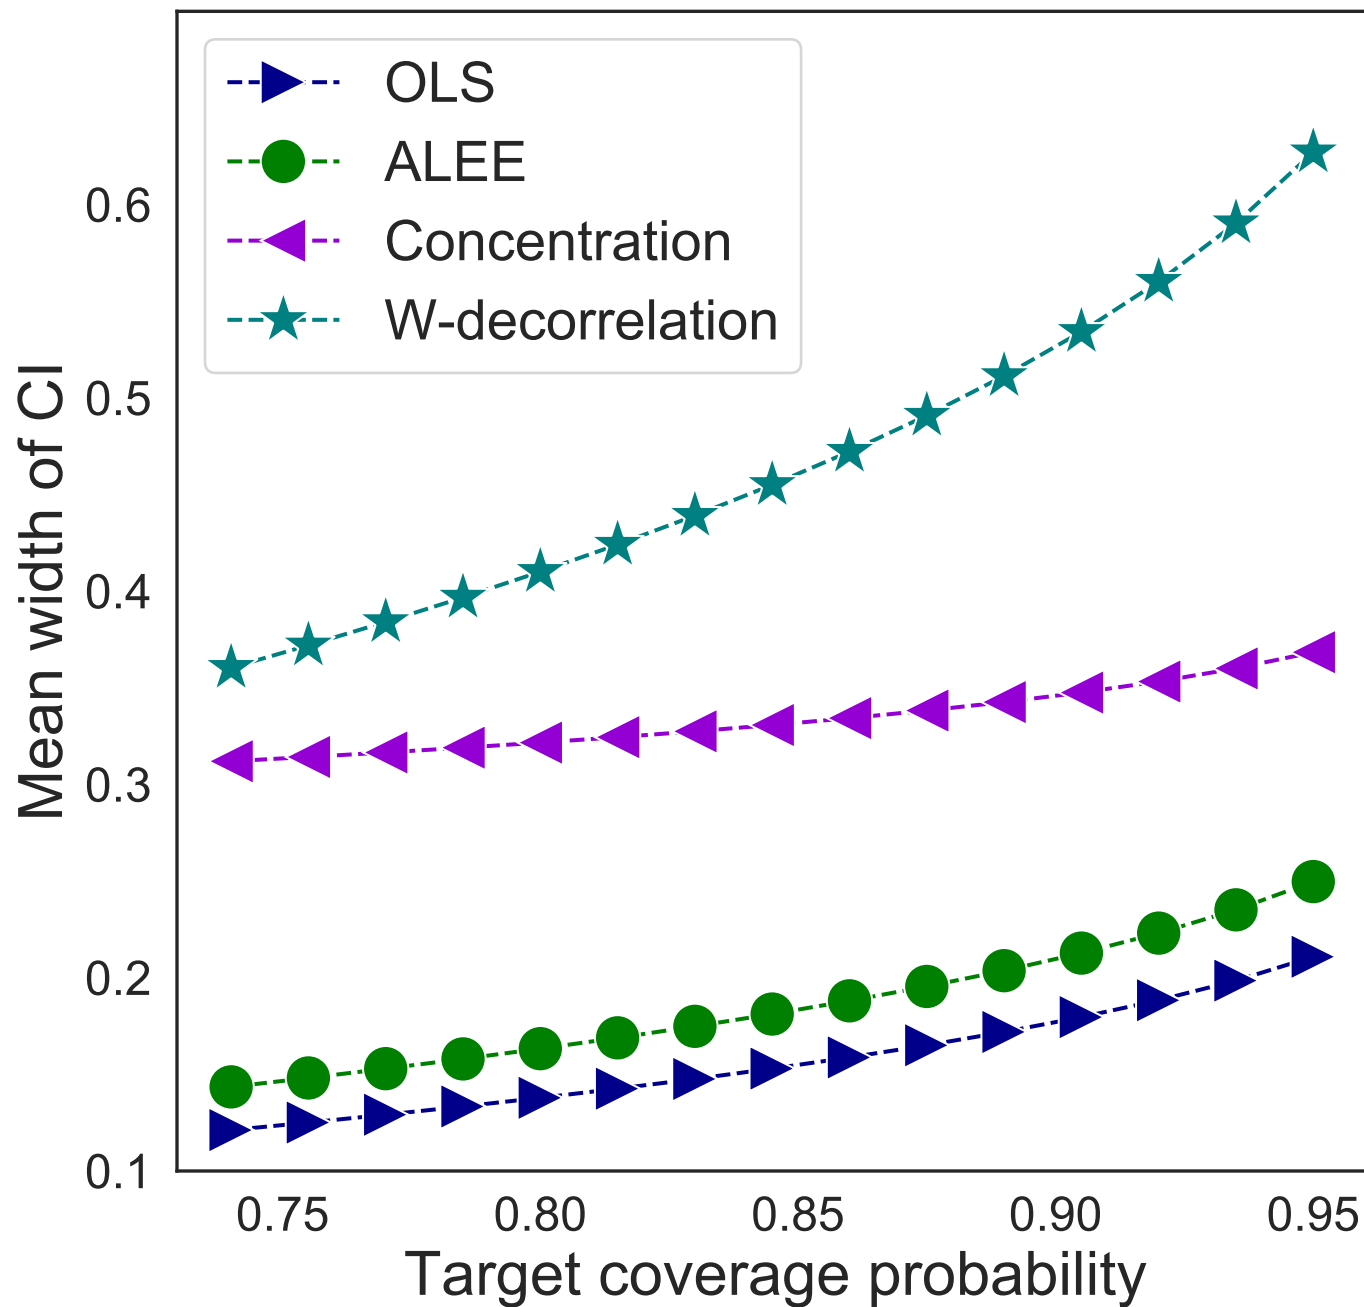

Supplement: supplementary_material [file attachment]

# Bandit: lower tail coverage for $\theta_1^*$

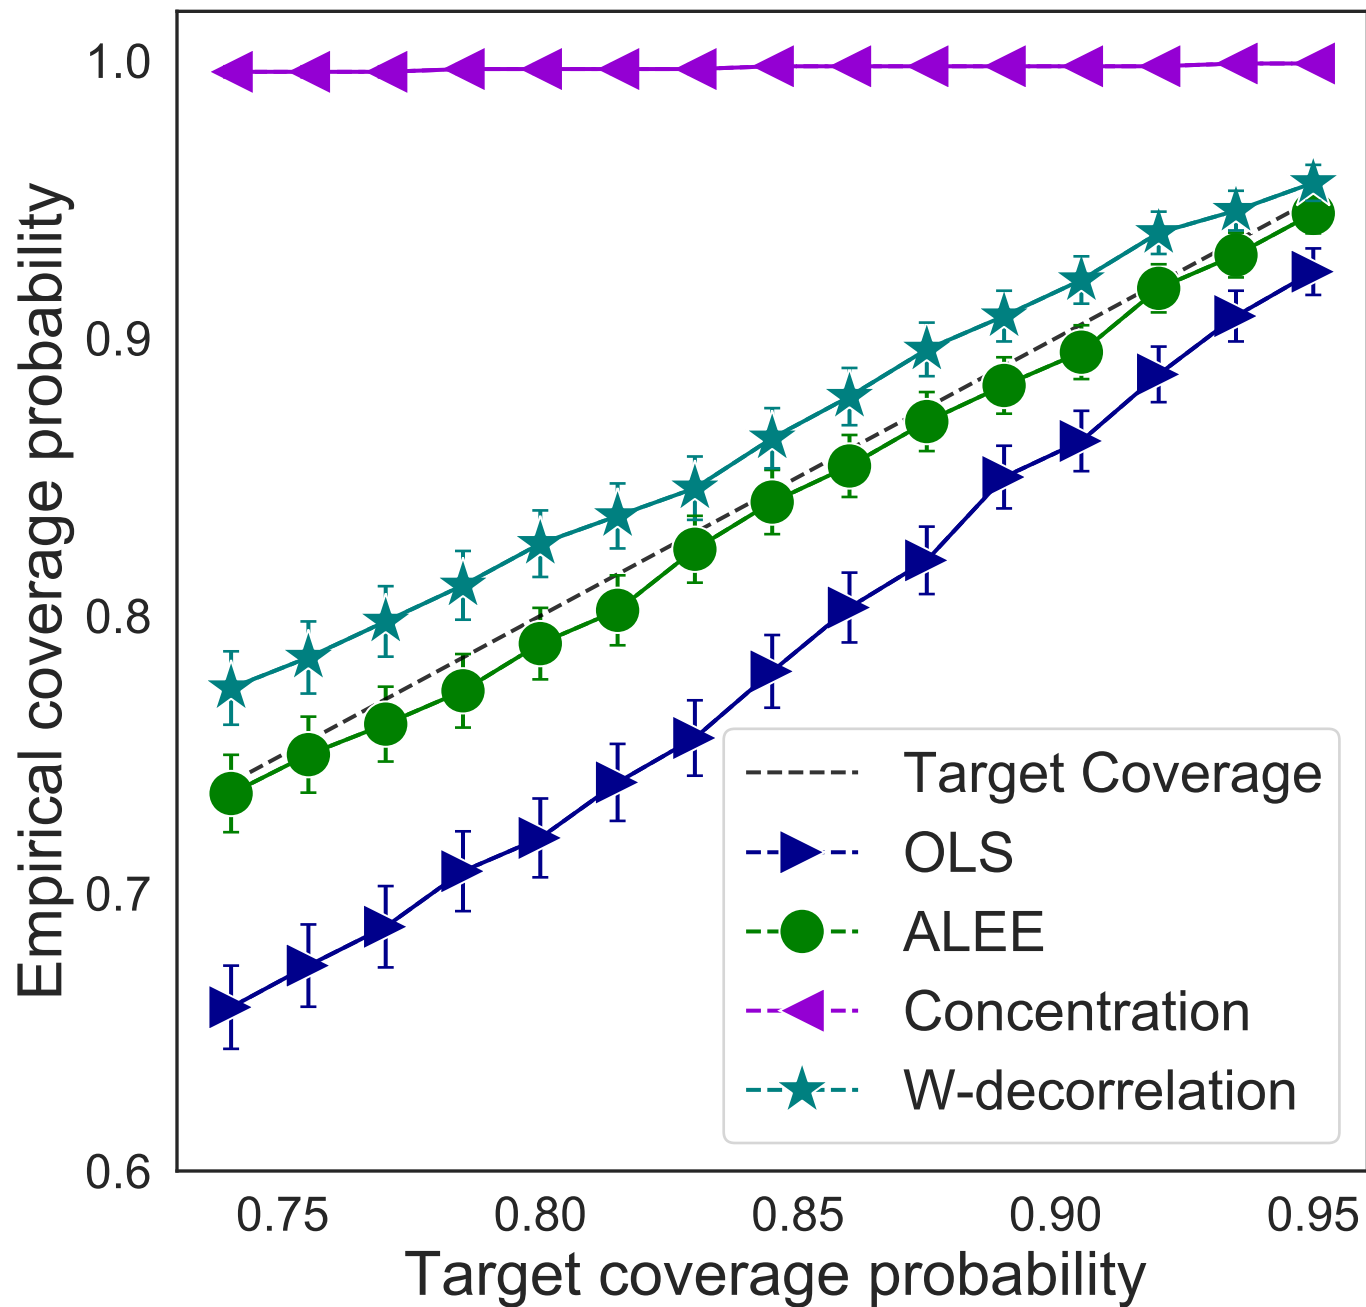

Supplement: supplementary_material [file attachment]

# Average two-sided CI width for $\theta^*$

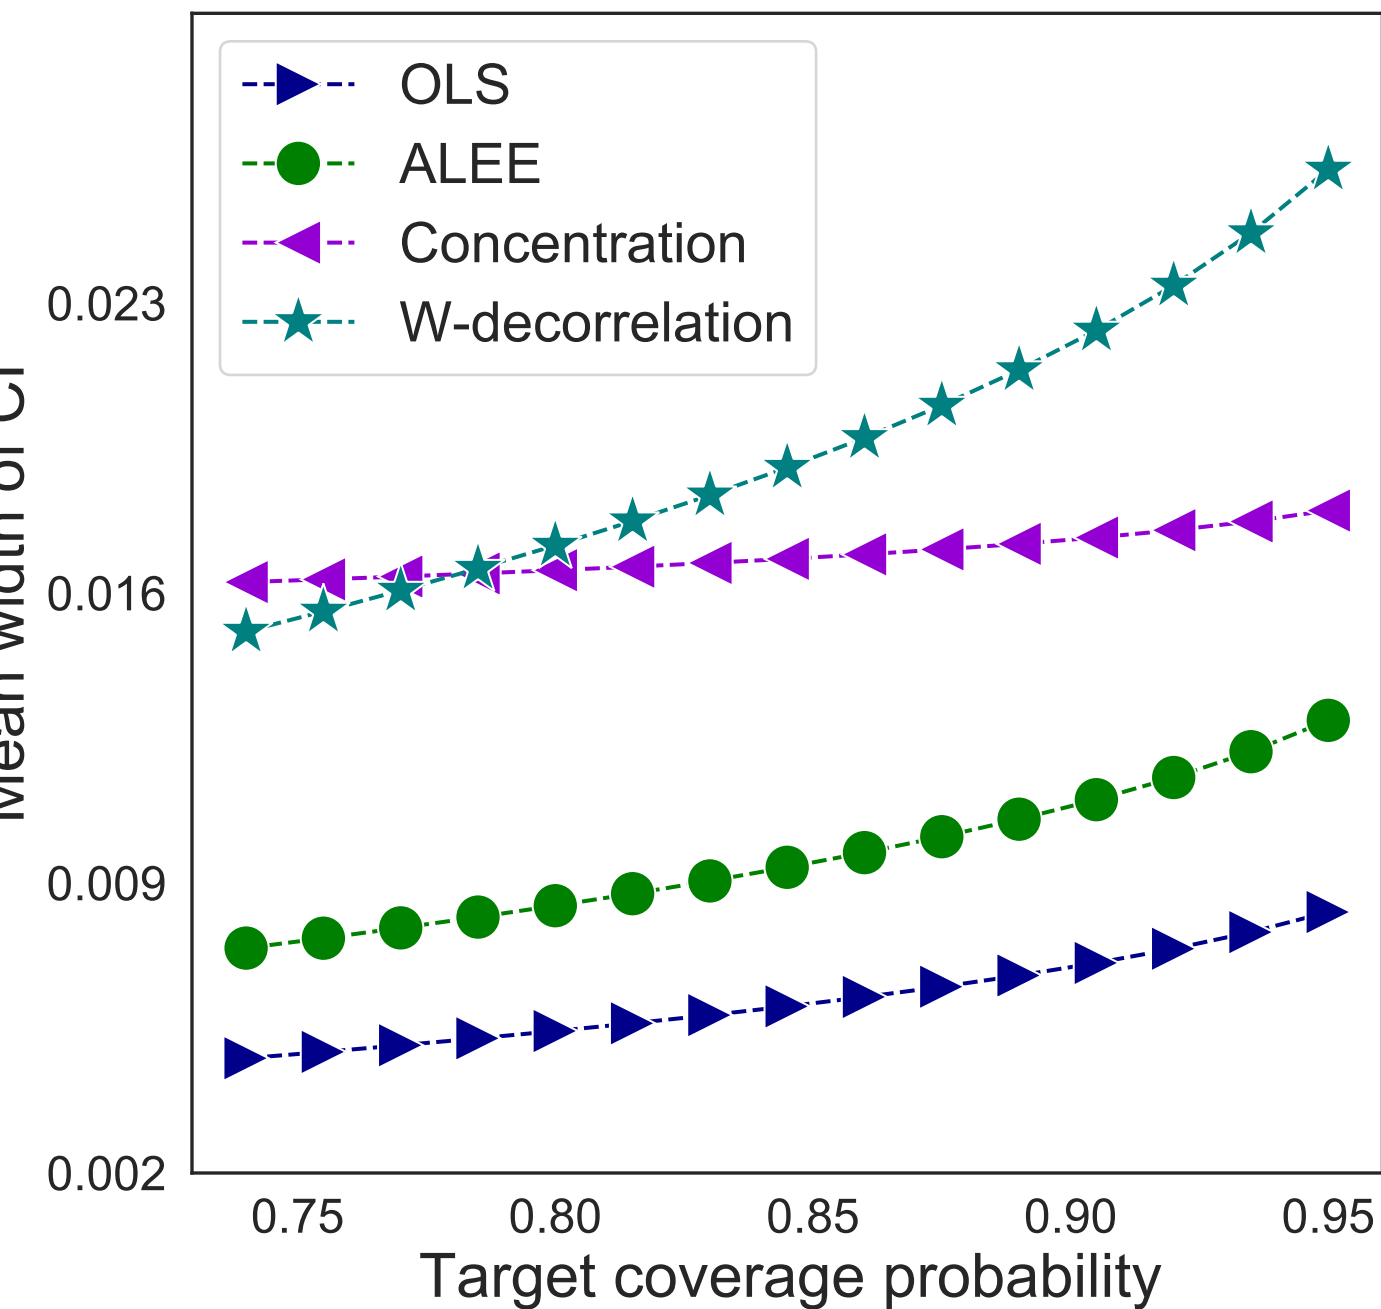

Supplement: supplementary_material [file attachment]

# Bandit: lower tail coverage for $\theta_1^*$

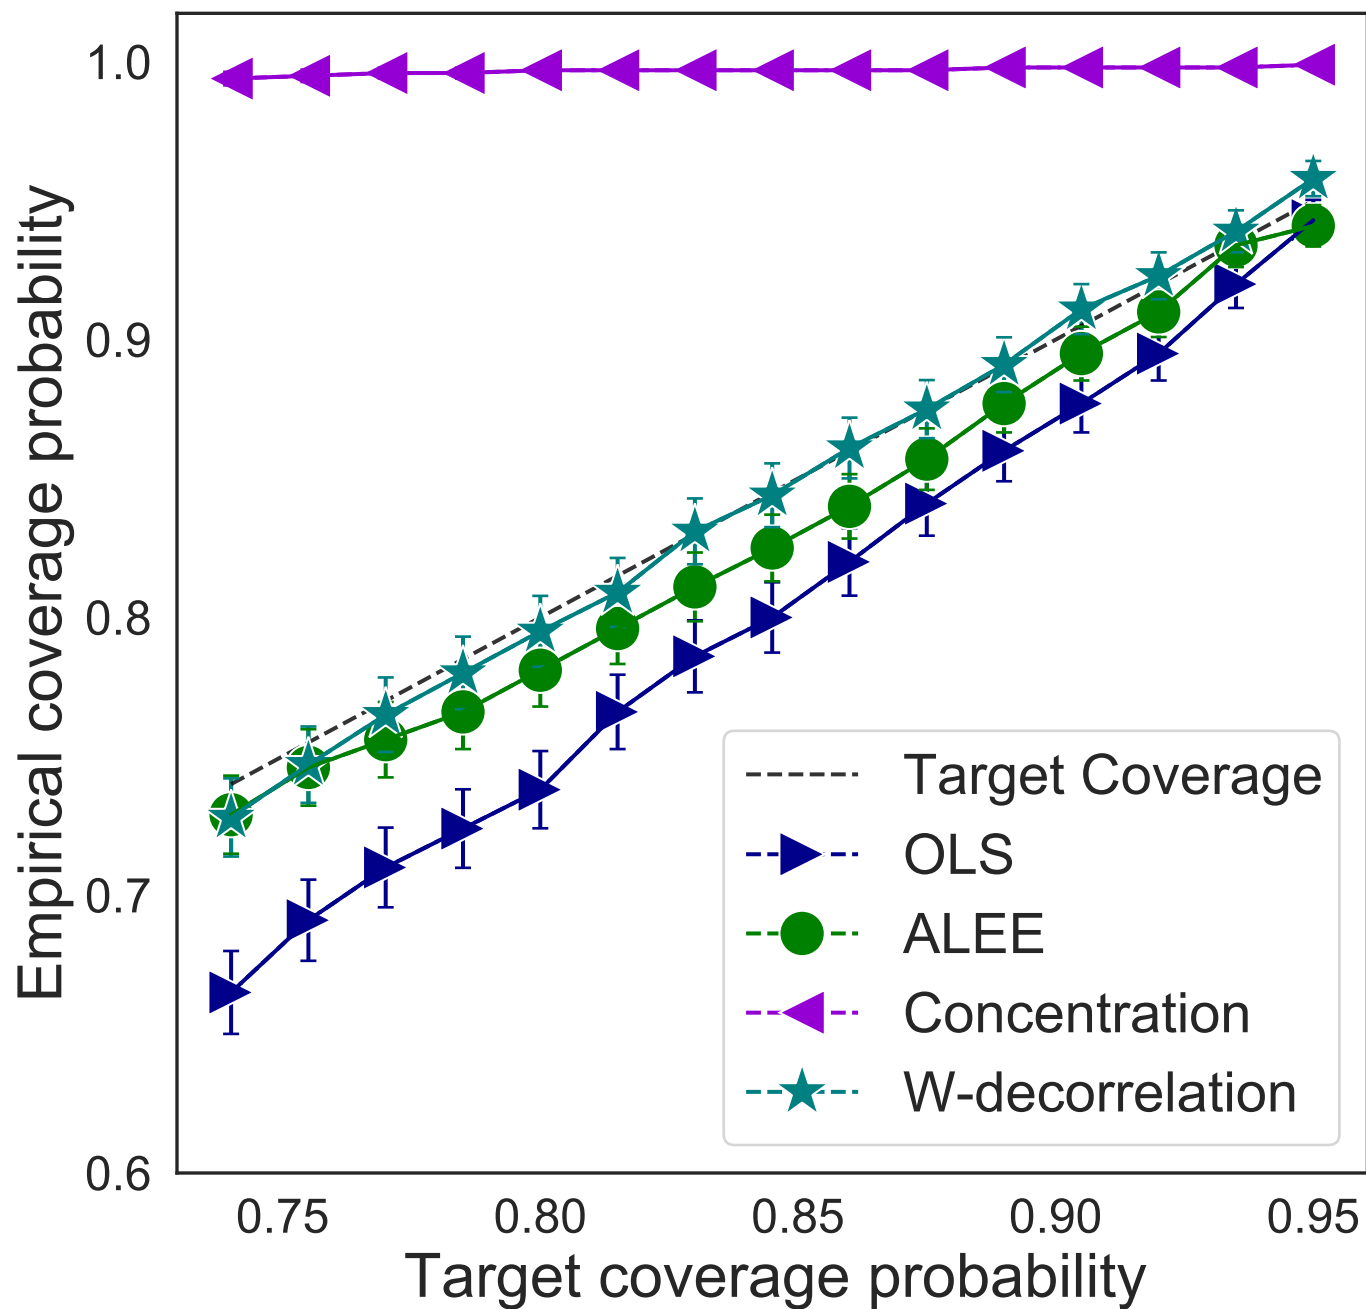

Supplement: supplementary_material [file attachment]

Bandit: upper tail coverage for  $\theta_1^*$

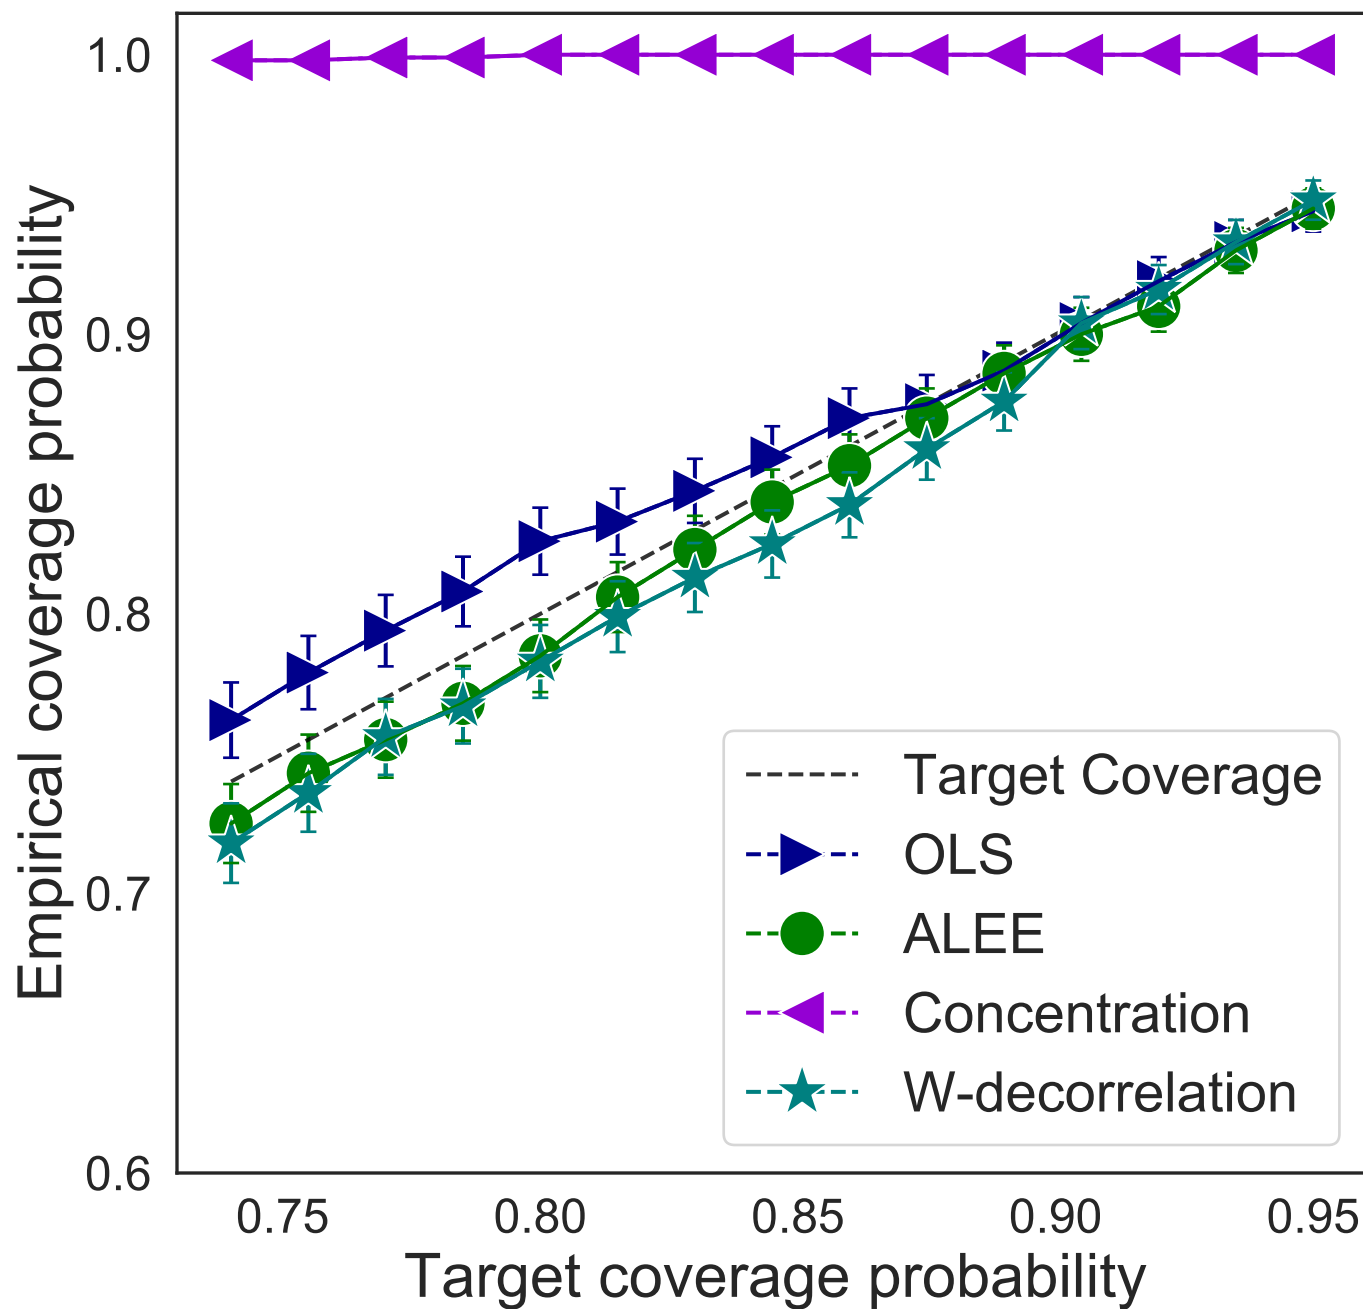

Supplement: supplementary_material [file attachment]

# Distribution of errors in AR(1)

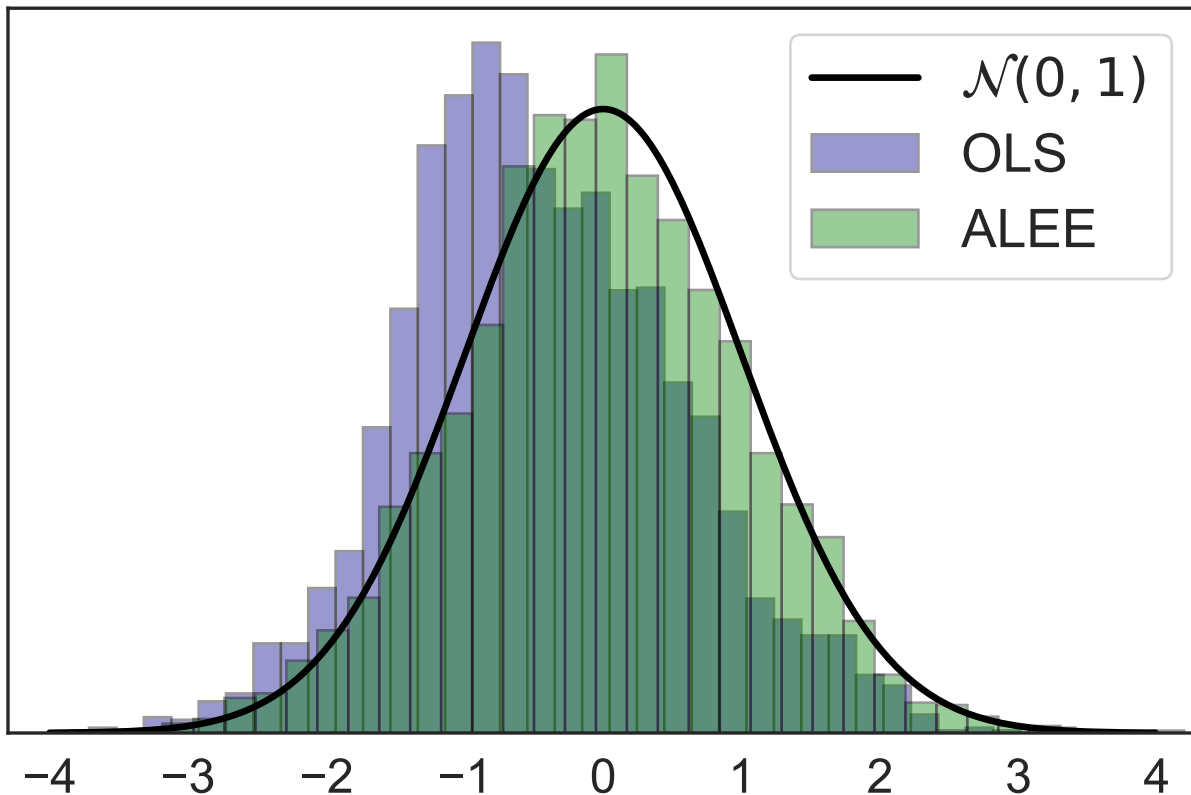

Supplement: supplementary_material [file attachment]

# Average two-sided CI width for $\theta_1^*$

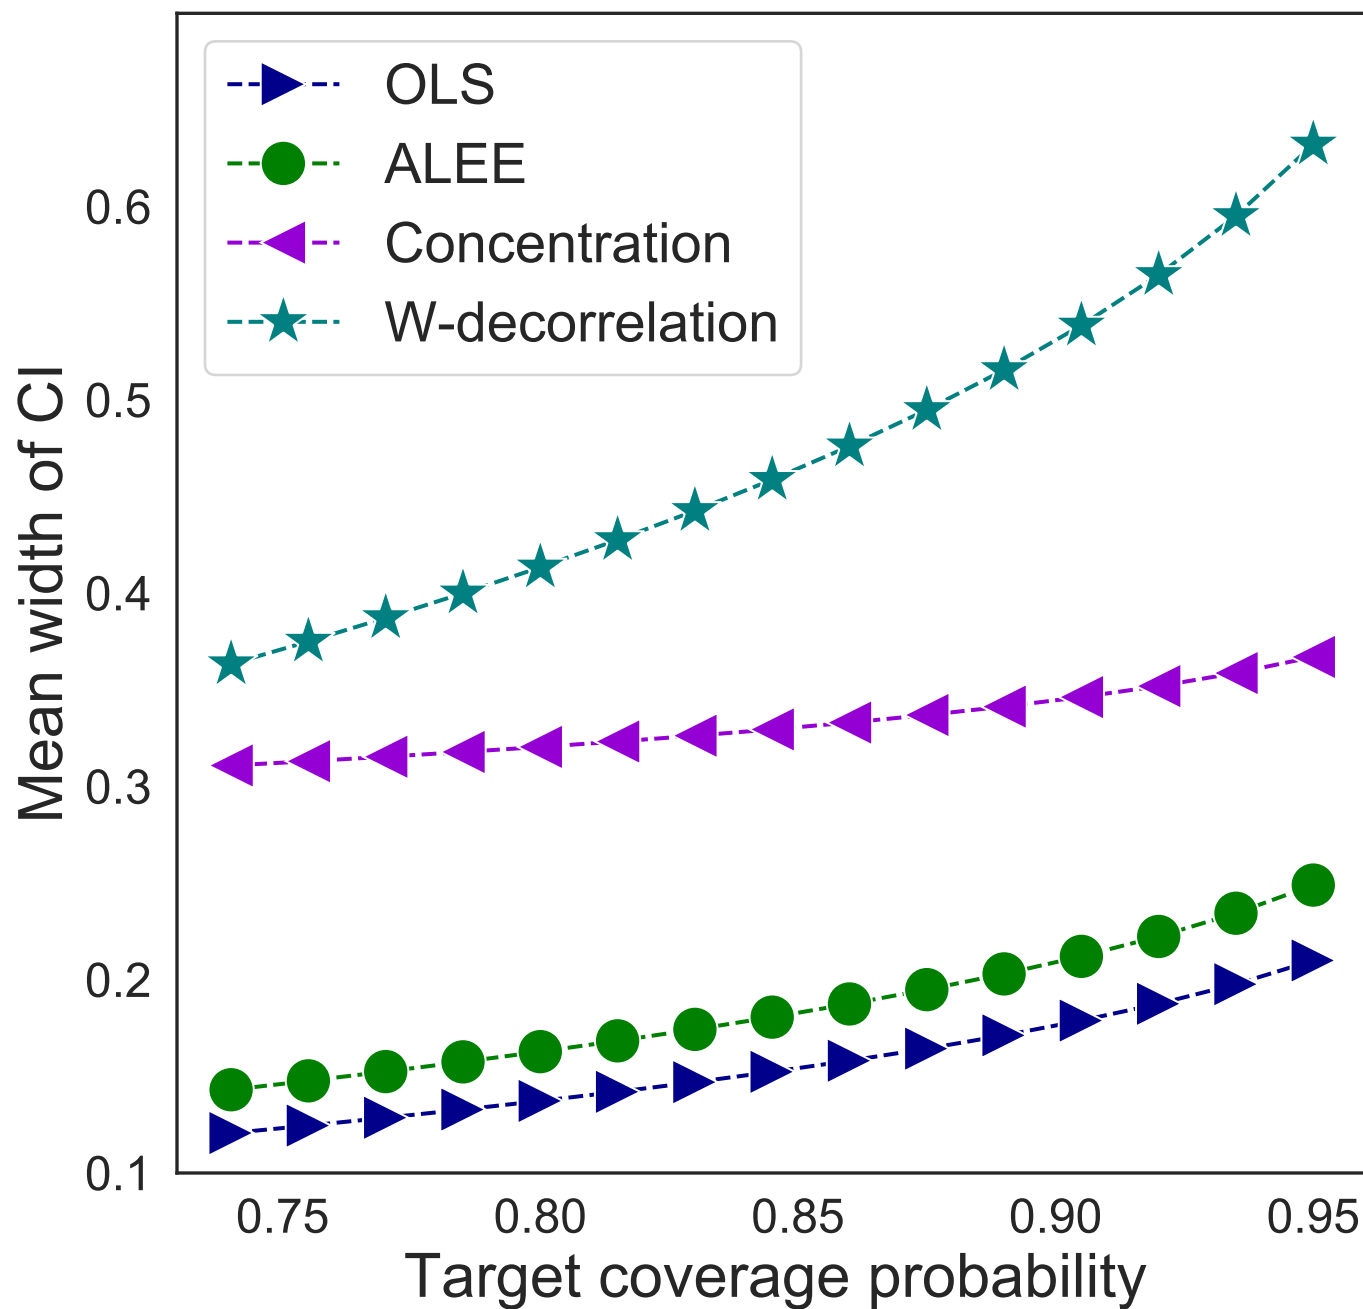

Supplement: supplementary_material [file attachment]

# Average two-sided CI width for $\theta^*$

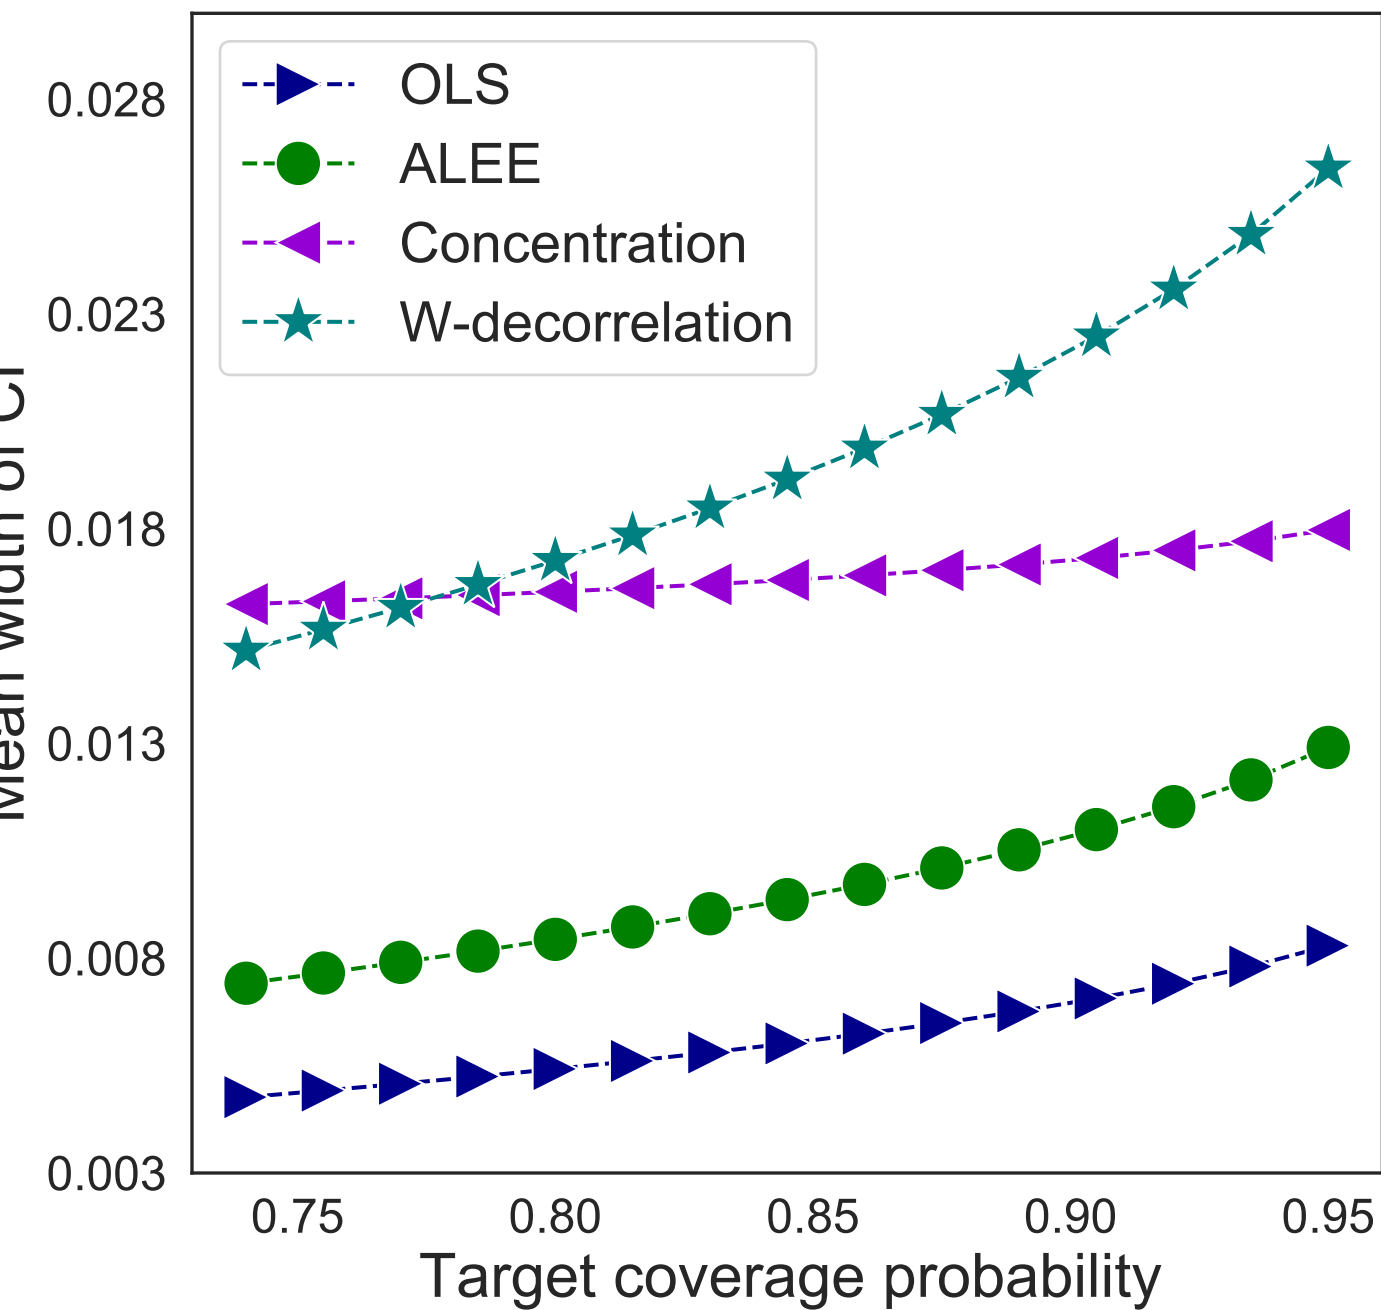

Supplement: supplementary_material [file attachment]

# AR: lower tail coverage for $\theta^*$

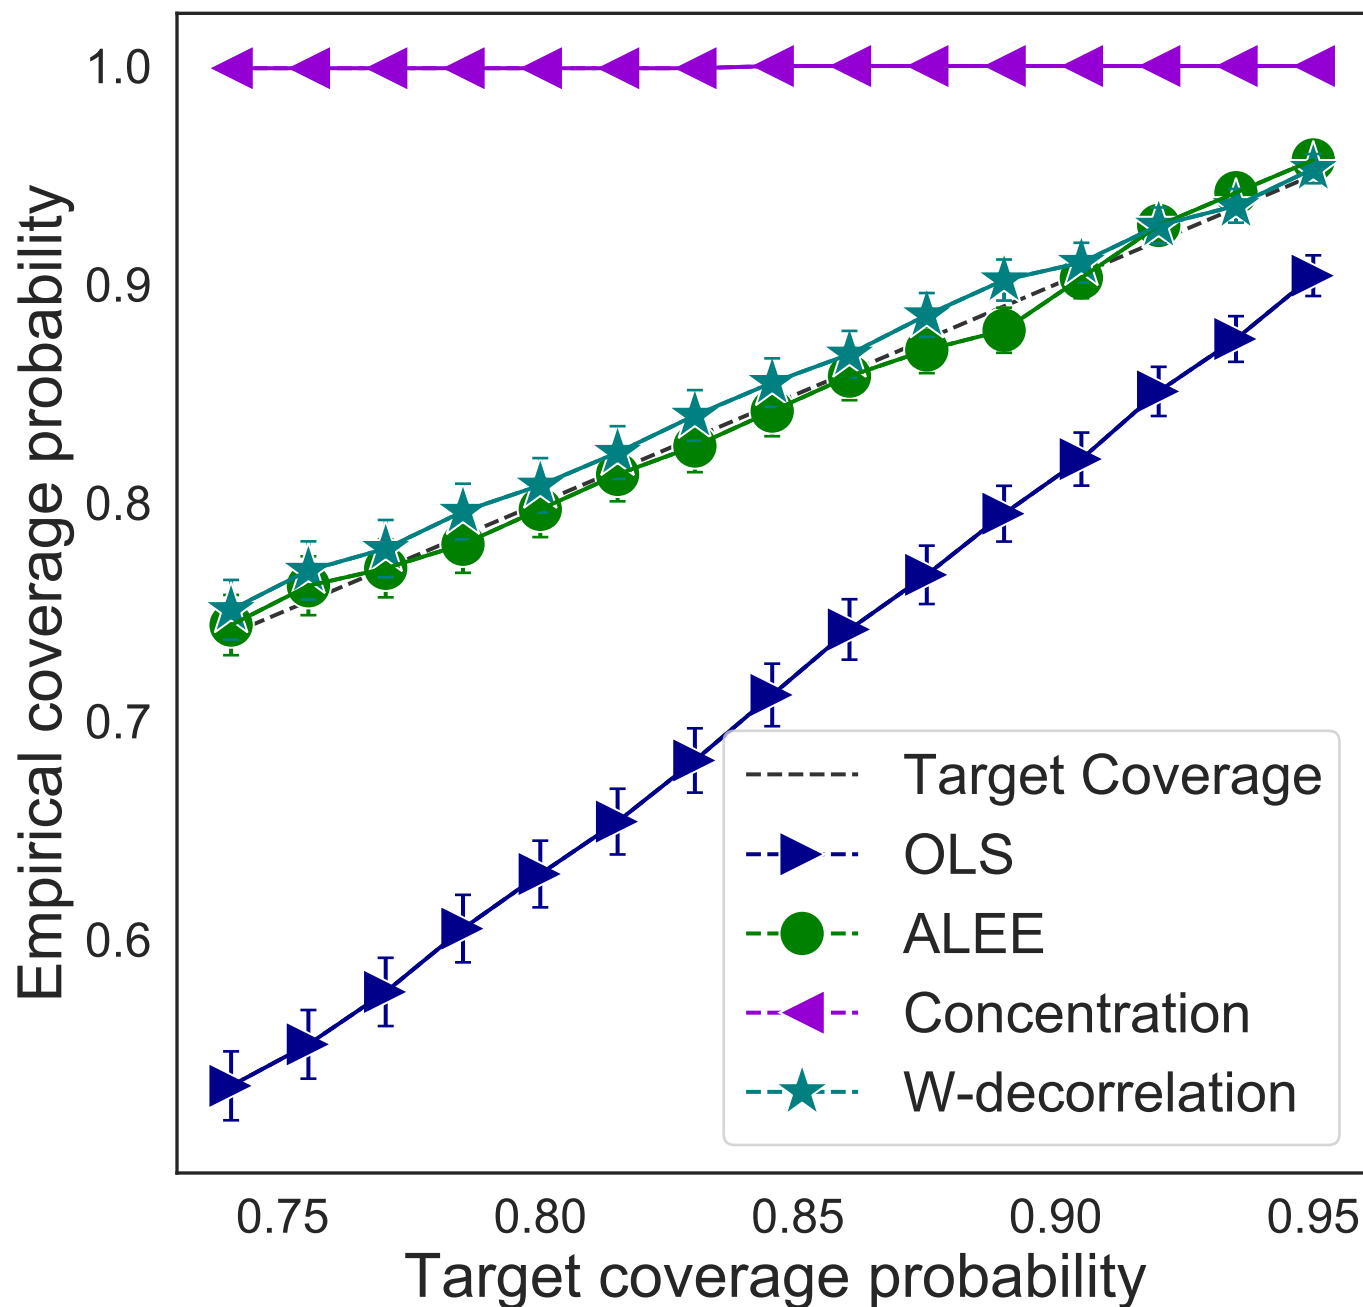

Supplement: supplementary_material [file attachment]

# AR: lower tail coverage for $\theta^*$

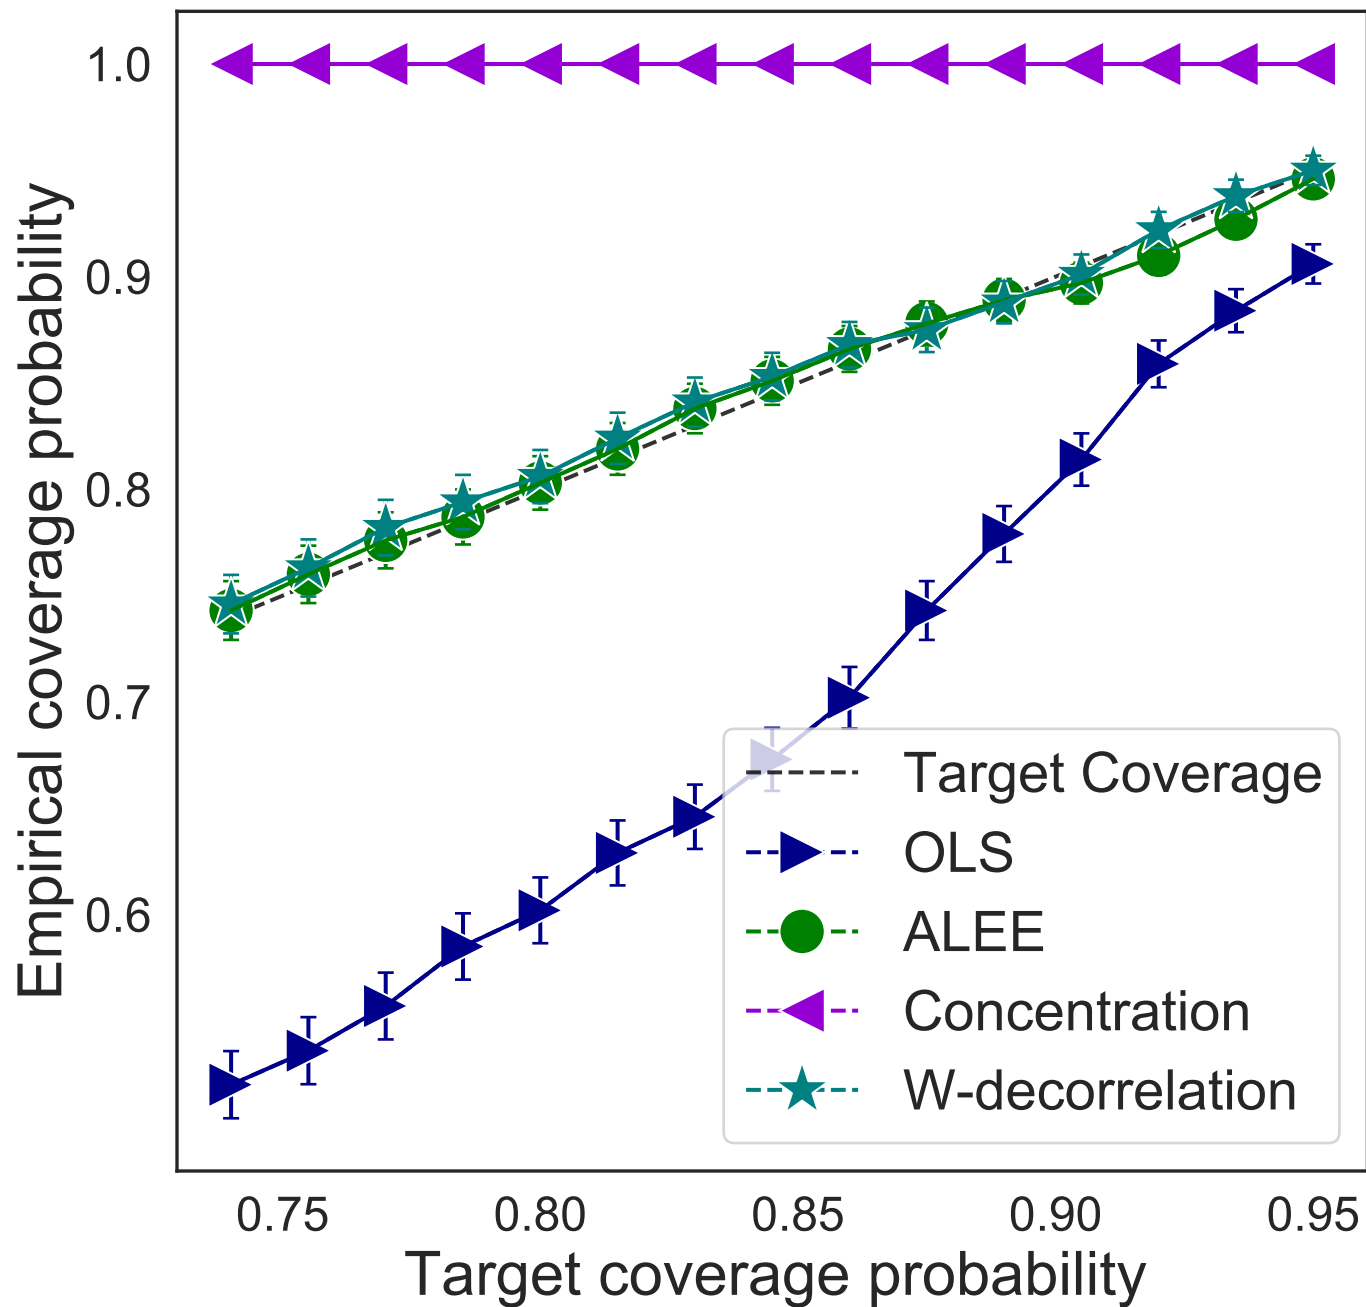

Supplement: supplementary_material [file attachment]

Bandit: upper tail coverage for  $\theta_1^*$

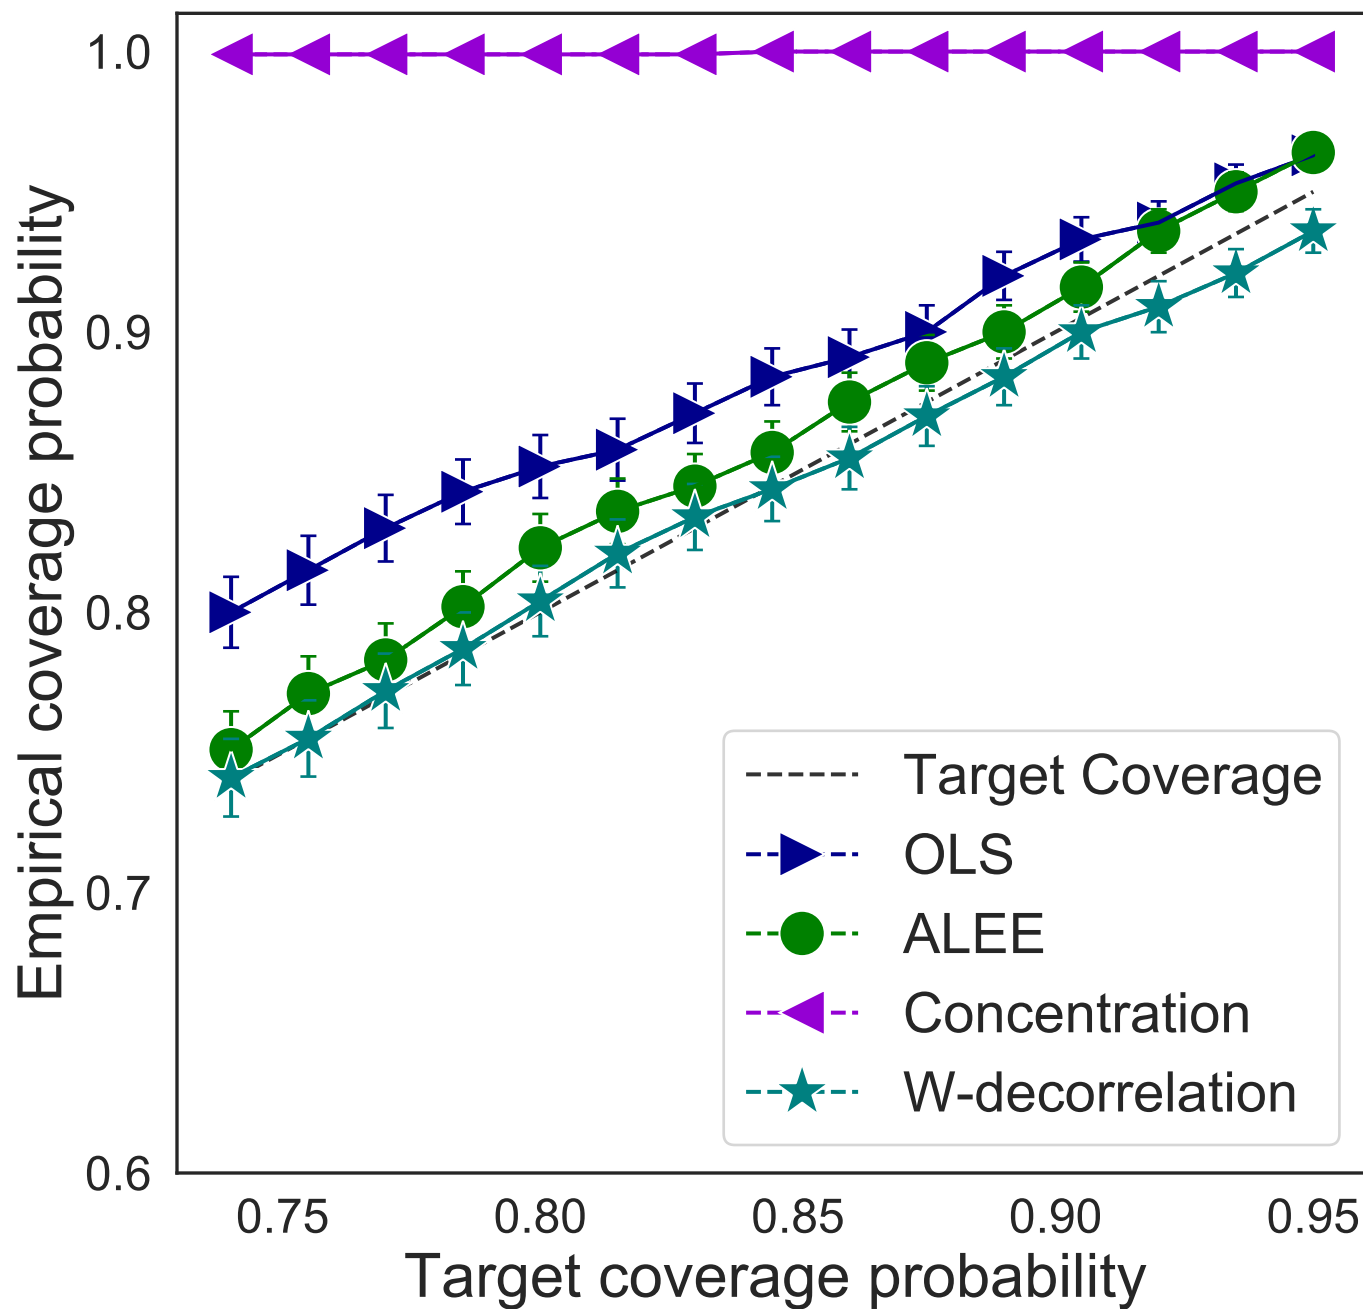

Supplement: supplementary_material [file attachment]
